# Supplementary material
Source: PubMed Central journal article supplement (PMC6599594)
Supplement: NIHMS1529475-supplement-2.pdf [file NIHMS1529475-supplement-2.pdf]

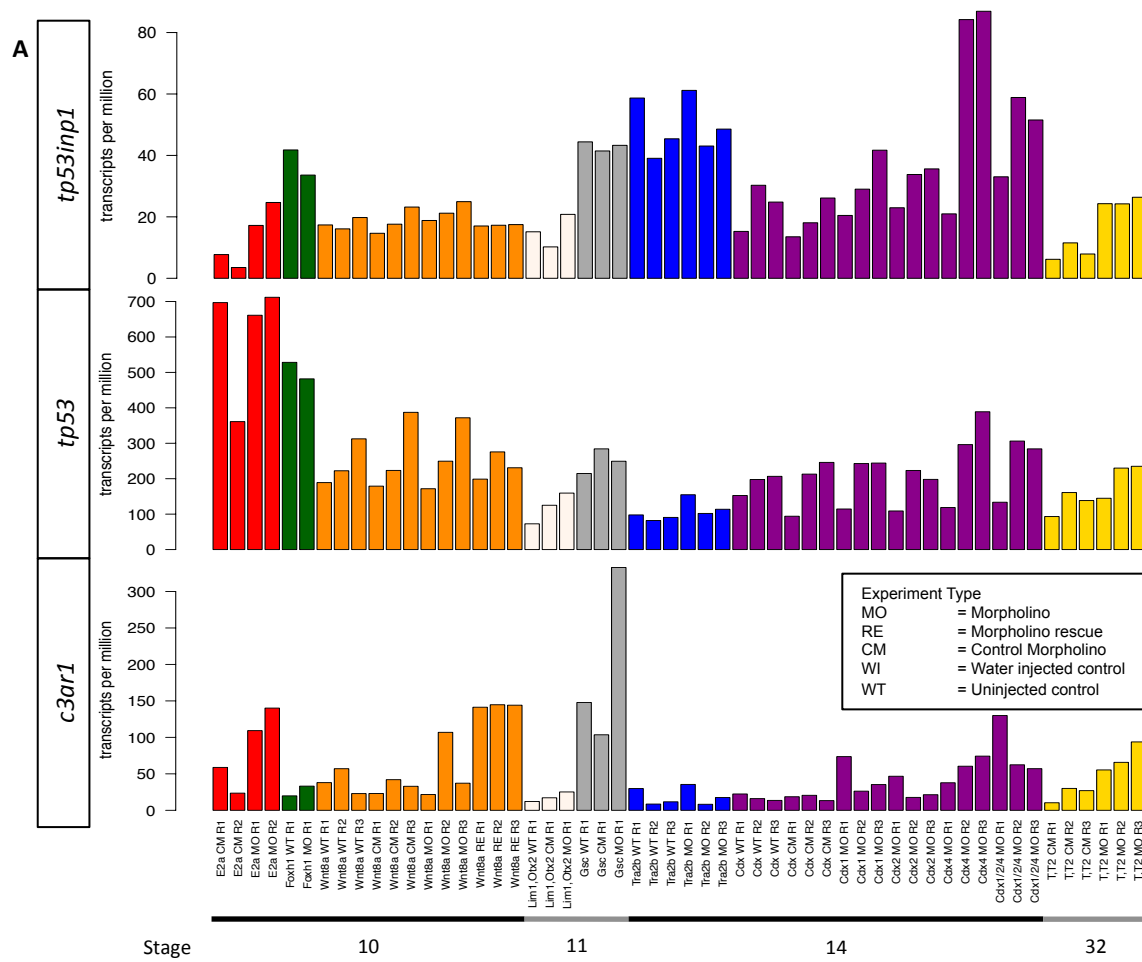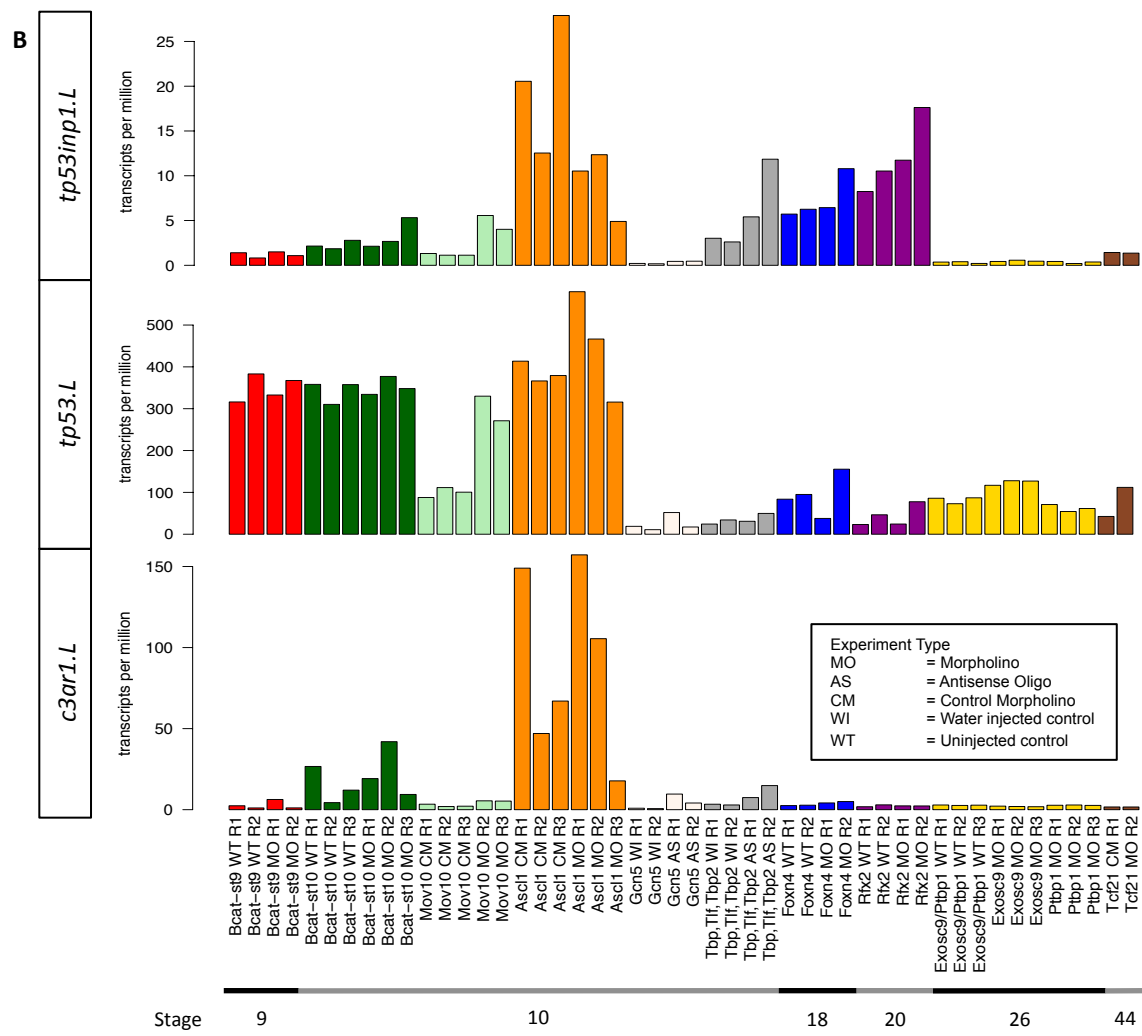

**Figure S1** (Related to Figure 1) Expression of innate immune response gene in *X. tropicalis* and *X. laevis* RNA-seq datasets. Expression of *Tp53inp1*, *Tp53* and *C3ar1* genes in *X. tropicalis* (A) and *X. laevis* (B) in transcripts per million from publicly available RNA-seq datasets.

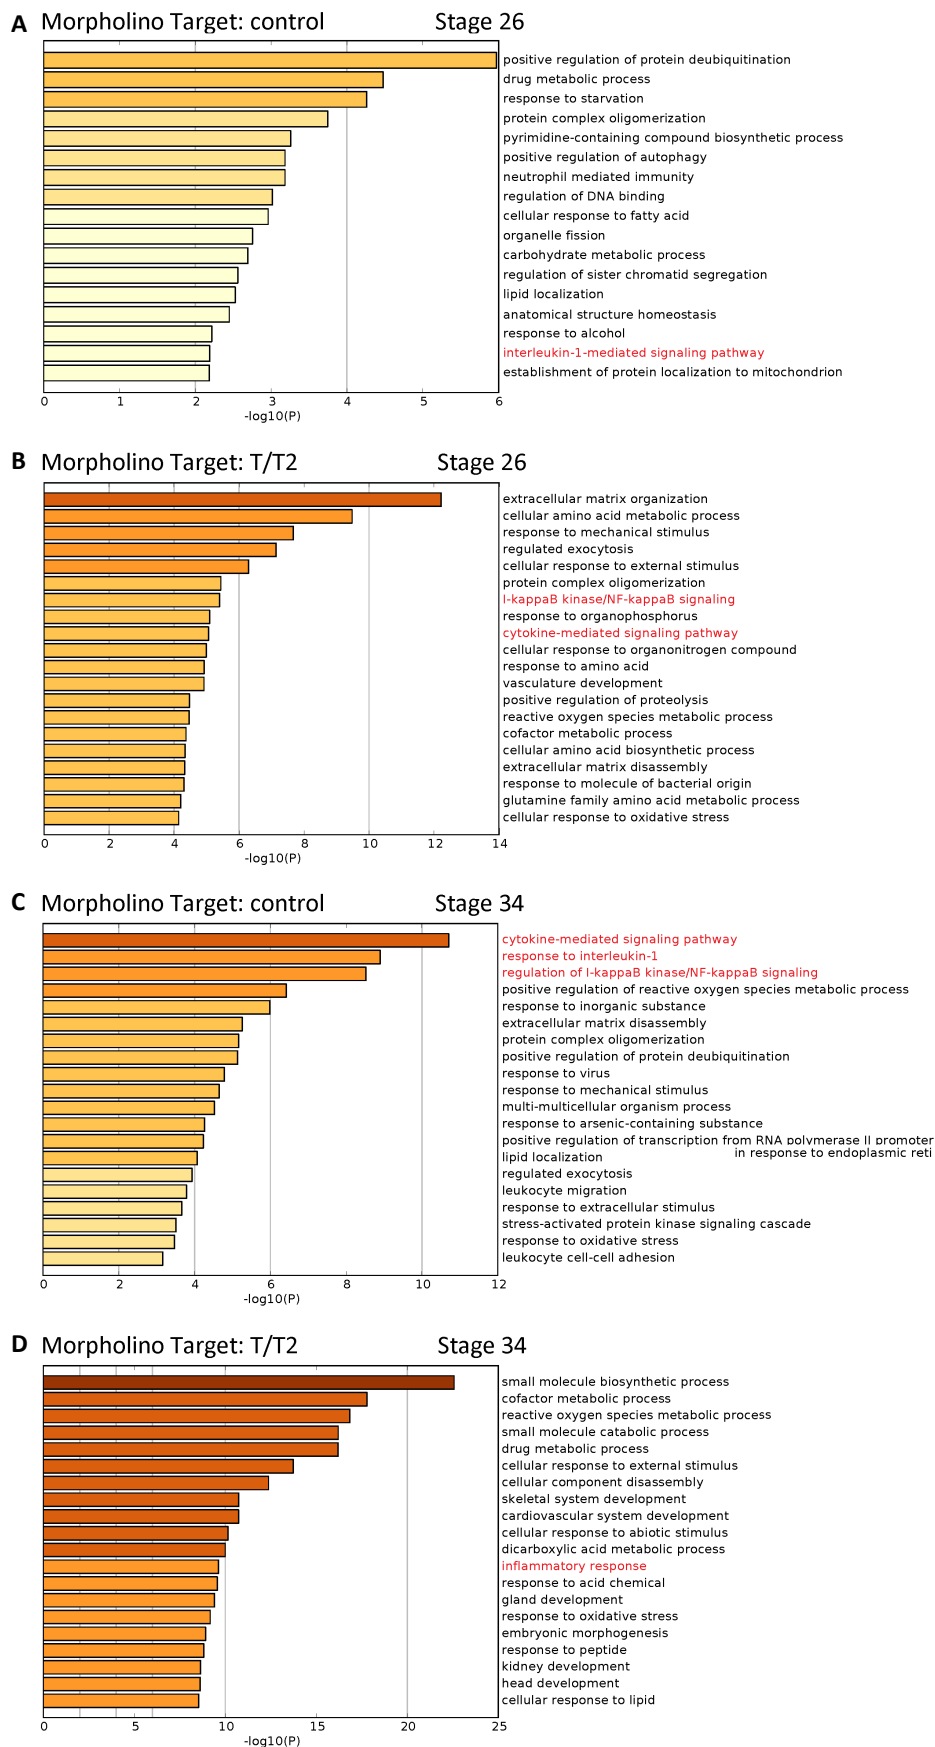

**Figure S2** (Related to figure 2 and 3) Gene ontology analysis of differentially expressed genes by various morpholinos in Gentsch et al. datasets. Gene ontology analysis of the control MO and T/T2 morpholino at stage 26 (A,B) and stage 34 (A,B). We used the criteria overlap  $\geq 3$ , p-value  $\leq 0.01$  and enrichment  $\geq 1.5$  to define significance. Red asterisk (\*) indicates innate immunity related GO terms.

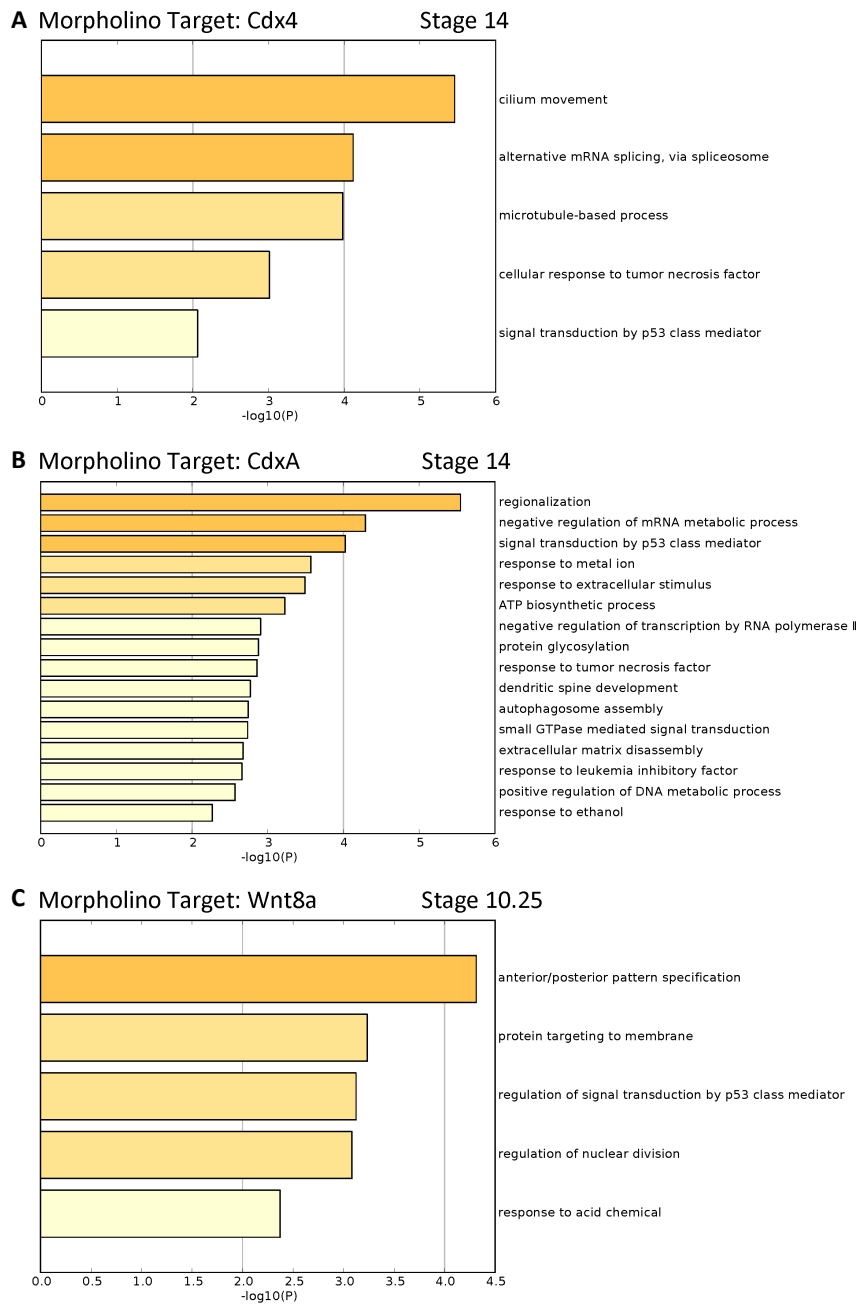

**Figure S3** (Related to figure 2 and 3) Gene ontology analysis of differentially expressed genes by various morpholinos in available *X. tropicalis* datasets. Gene ontology analysis of the Cdx4 MO (A), Cdx1/2/4 MO (B), and Wnt8a MO (C). We used the criteria overlap  $\geq 3$ , p-value  $\leq 0.01$  and enrichment  $\geq 1.5$  to define significance.

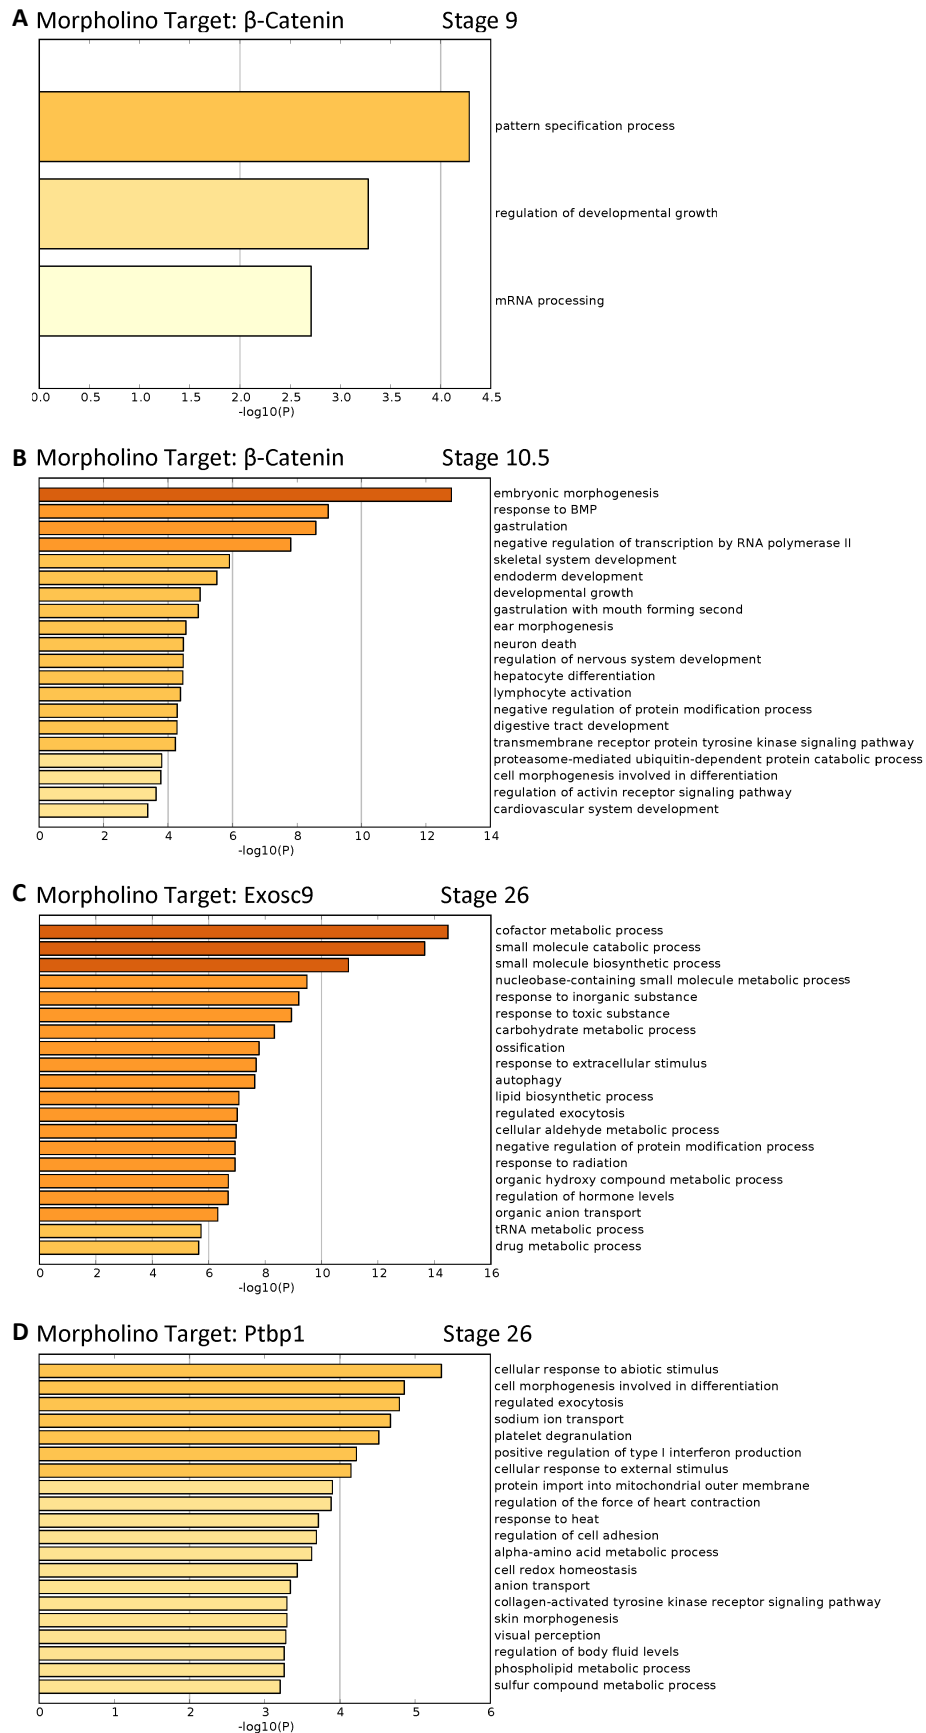

**Figure S4** (Related to figure 2 and 3) Gene ontology analysis of differentially expressed genes by various morpholinos in available *Xenopus laevis* datasets. Gene ontology analysis of the  $\beta$ -catenin MO at stage 9 and 10 (A,B), Exosc9 MO (C) and Ptpb1 MO (D). We used the criteria overlap  $\geq 3$ ,  $p$ -value  $\leq 0.01$  and enrichment  $\geq 1.5$  to define significance.

| Accession                                                                       | Experimental Morpholino(s)             | Control Morpholino | Replicates | Organism             | Collection Stage      | Collected Tissue  | Citation              |
|---------------------------------------------------------------------------------|----------------------------------------|--------------------|------------|----------------------|-----------------------|-------------------|-----------------------|
| GSE72657                                                                        | Wnt8a                                  | Yes                | 3          | <i>X. tropicalis</i> | St 10                 | Whole embryo      | Nakamura et al., 2016 |
| GSE53654                                                                        | Foxh1                                  | No                 | 1          | <i>X. tropicalis</i> | St 10                 | Whole embryo      | Chiu et al., 2014     |
| GSE56169                                                                        | E2a                                    | Yes                | 2          | <i>X. tropicalis</i> | St 10                 | Whole embryo      | Wills et al., 2015    |
| DRA000516,<br>DRA000517,<br>DRA000518,<br>DRA001093,<br>DRA001094,<br>DRA001095 | Lim1+Otx2+Otx5, Gsc                    | Yes                | 1          | <i>X. tropicalis</i> | St 11                 | Whole embryo      | Yasuoka et al., 2014  |
| GSE86382                                                                        | Mov10                                  | Yes                | 2 or 3     | <i>X. laevis</i>     | St 10                 | Whole embryo      | Skariah et al., 2018  |
| GSE93195                                                                        | Beta-catenin                           | No                 | 2 or 3     | <i>X. laevis</i>     | Stage 9 and 10        | Whole embryo      | Ding et al., 2017     |
| GSE76995                                                                        | Tbp + Tlf + Tbp2, Gcn5 (Antisense DNA) | No                 | 2          | <i>X. laevis</i>     | St 10                 | Whole embryo      | Gazdag et al., 2016   |
| GSE76915                                                                        | Ascl1                                  | Yes                | 3          | <i>X. laevis</i>     | St 10                 | Whole embryo      | Gao et al., 2016      |
| GSE50593                                                                        | Rfx2                                   | No                 | 2          | <i>X. laevis</i>     | Stage 20              | Isolated ectoderm | Kwon et al., 2014     |
| GSE45786                                                                        | Tcf21                                  | Yes                | 1          | <i>X. laevis</i>     | St 44 – 45            | Whole embryo      | Tandon et al., 2013   |
| GSE71006                                                                        | Cdx1, Cdx2, Cdx4, Cdx1/2/4             | Yes                | 3          | <i>X. tropicalis</i> | Stage 14              | Whole embryo      | Marlétaz et al., 2015 |
| GSE48663                                                                        | Tbxt/Tbxt2                             | Yes                | 3          | <i>X. tropicalis</i> | Stage 32              | Whole embryo      | Gentsch et al., 2013  |
| GSE89271                                                                        | Foxn4                                  | No                 | 2          | <i>X. laevis</i>     | Stage 18              | Isolated ectoderm | Campbell et al., 2016 |
| PRJEB8711                                                                       | Ptbp1, Exosc9                          | No                 | 1          | <i>X. laevis</i>     | Stage 26              | Whole embryo      | Noiret et al., 2016   |
| PRJNA266550                                                                     | Tra2b                                  | Yes                | 3          | <i>X. laevis</i>     | Stage 14              | Whole embryo      | Dichmann et al., 2015 |
| GSE96655                                                                        | Tbxt/Tbxt2                             | Yes                | 3          | <i>X. tropicalis</i> | Stage 24 and Stage 36 | Whole embryo      | Gentsch et al., 2018  |

**Table S1** (Related to Figure 1-4) List of RNA-seq datasets that contained a morpholino experiment used in this study.

| Tropicalis | Tp53inp1   |          | Tp53     |          | C3ar1    |          |
|------------|------------|----------|----------|----------|----------|----------|
|            | Reported   | Measured | Reported | Measured | Reported | Measured |
| Control MO | 0.97       | 0.84     | 1.06     | 0.96     | 0.97     | 1.01     |
| Tra2b MO   | 1.05       | 1.07     | 1.37     | 1.36     | 1.43     | 1.22     |
| Cdx2 MO    | 1.15       | 1.35     | 0.84     | 0.93     | 1.55     | 1.57     |
| Cdx1 MO    | 1.23       | 1.33     | 1.06     | 1.05     | 2.69     | 2.5      |
| Cdx4 MO    | 2.43       | 2.55     | 1.38     | 1.39     | 3.19     | 3.64     |
| CdxA MO    | 2.06       | 2.06     | 1.37     | 1.27     | 5.27     | 4.63     |
| Control MO | 1.58       | 1.48     | 1.62     | 1.52     | 4.37     | 5.37     |
| T/T2 MO    | 3.92       | 3.7      | 2.67     | 2.37     | 14.08    | 14.8     |
| Laevis     | Tp53inp1.L |          | Tp53.L   |          | C3ar1.L  |          |
|            | Reported   | Measured | Reported | Measured | Reported | Measured |
| Ptbp1 MO   | 0.87       | 1.15     | 0.74     | 0.75     | 0.79     | 0.99     |
| Rfx2 MO    | 1.74       | 1.54     | 1.68     | 1.36     | 0.9      | 1.03     |
| Exosc9 MO  | 1.62       | 1.6      | 1.57     | 1.52     | 3.59     | 0.72     |

**Table S2** (Related to Figure 1) Comparison of fold change generated between our analysis and the Gentsch et al. (2018) analysis.
